# Supplementary material
Source: publisher figshare collection journal article supplement (https://frontiersin.figshare.com/ndownloader/files/27045212)
Supplement: Supplementary file [file 27045212]

**Supplementary Table 3.** Definitions of common variable immunodeficiency.

| ESID/PAGID                                                                                                                                                                                                                                                                                                                                                                                                                                                                                                                                                                                                     | ESID diagnostic criteria                                                                                                                                                                                                                                                                                                                                                                                                                                                                                                                                                                                  | IUIS criteria                                                                    | WHO scientific group                                                             | ICON                                                                                                                                                                         |
|----------------------------------------------------------------------------------------------------------------------------------------------------------------------------------------------------------------------------------------------------------------------------------------------------------------------------------------------------------------------------------------------------------------------------------------------------------------------------------------------------------------------------------------------------------------------------------------------------------------|-----------------------------------------------------------------------------------------------------------------------------------------------------------------------------------------------------------------------------------------------------------------------------------------------------------------------------------------------------------------------------------------------------------------------------------------------------------------------------------------------------------------------------------------------------------------------------------------------------------|----------------------------------------------------------------------------------|----------------------------------------------------------------------------------|------------------------------------------------------------------------------------------------------------------------------------------------------------------------------|
| <u>Probable</u><br>Marked decrease ( $\geq 2$ SD below mean for age) in serum IgG and IgA and:<br>1. Onset of immunodeficiency $\geq 2$ years of age<br>2. Absent isohemagglutinins and/or poor response to vaccines<br>3. Defined causes of hypogammaglobulinemia have been excluded<br><br><u>Possible</u><br>Marked decrease ( $\geq 2$ SD below mean for age) in one of the major isotypes (IgM, IgG, and IgA) and:<br>1. Onset of immunodeficiency $\geq 2$ years of age<br>2. Absent isohemagglutinins and/or poor response to vaccines<br>3. Defined causes of hypogammaglobulinemia have been excluded | <u>At least one of the following:</u><br>-increased susceptibility to infection<br>-autoimmune manifestations<br>-granulomatous disease<br>-unexplained polyclonal lymphoproliferation<br>-affected family member with antibody deficiency<br><br><u>AND</u> marked decrease of IgG and IgA with or without low IgM levels;<br><br><u>AND</u> at least one of the following:<br>-poor antibody response to vaccines<br>-low switched memory B cells ( $< 70\%$ of age-related normal value)<br><br><u>AND</u> secondary causes have been excluded (e.g., infection, protein loss, medication, malignancy) | Decreased serum levels of IgG, IgA, and/or IgM ( $\geq 2$ SD below mean for age) | Decreased serum levels of IgG, IgA, and/or IgM ( $\geq 2$ SD below mean for age) | Decreased serum levels of IgG, IgA, and/or IgM ( $\geq 2$ SD below mean for age), impairment of specific antibody responses, and, occasionally, reductions in B-cell numbers |

Abbreviations: ESID, European Society for Immunodeficiencies; ICON, International Consensus Document; IUIS, International Union of Immunological Societies; PAGID, Pan-American Group for Immunodeficiency; WHO, World Health Organization.
